# Supplementary material for: Effective post treatment for preparing highly conductive carbon nanotube/reduced graphite oxide hybrid films
Source: Royal Society of Chemistry journal article supplement (doi:10.1039/c0nr00655f), 2010-12-04
Supplement: c0nr00655f.pdf [file c0nr00655f.pdf]

## **Supplementary Information**

# **Effective Post-Treatment for Preparing Highly Conductive Carbon Nanotube/Reduced Graphite-Oxide Hybrid Films**

*Ranran Wang, Jing Sun\*, Lian Gao\*, Chaohe Xu, Jing Zhang and*

*Yangqiao Liu*

*The State Key Lab of High Performance Ceramics and Superfine Microstructure,  
Shanghai Institute of Ceramics, Chinese Academy of Sciences, 1295 Ding Xi Road,*

*Shanghai 200050, China*

*E-mail address: [jingsun@mail.sic.ac.cn](mailto:jingsun@mail.sic.ac.cn) (J. Sun), [liangao@mail.sic.ac.cn](mailto:liangao@mail.sic.ac.cn) (L. Gao);*

*Tel: +86-12-52412718. Fax: +86-21-52413122*

## **Experimental Methods**

**Chemicals:** The P3 SWNTs (from Carbon Solutions Inc.) synthesized by arc-discharge were used as received. RNA (double strand, salmon sperm, 2000 base pairs) was obtained from Sigma Chemicals. Graphite flake (bought from alfa-aesar Co., ltd) was exfoliated into GO by modified Hummers' method. 1.0 g of graphite flakes, 1.0 g of NaNO<sub>3</sub> and 46 mL of concentrated H<sub>2</sub>SO<sub>4</sub> were mixed together in an ice bath for 4 h. Then 6.0 g of KMnO<sub>4</sub> was added slowly into the solution. Afterwards, the ice bath was removed and the suspension was stirred for another 4 h. After adding 92 mL of distilled water dropwise, the suspension was heated in oil bath at 98 °C for 30 min. Then the suspension was further treated with 200 mL of warm water and 20 mL of H<sub>2</sub>O<sub>2</sub> (30%). The mixture was centrifuged at 4000 rpm and washed with HCl and water. Then the

sample was dried at 50 °C for 48 h to obtain GO.

**Preparation of SWCNT/GO hybrid films:** RNA was dissolved in 0.03 M NaAc aqueous solution. SWCNTs and GO were added and bath sonicated in RNA solution for 2 h. The weight ratio between SWCNTs and GO was 10:1 and that between SWCNTs and RNA was 1:1. The obtained dark solution was centrifuged at 8000 rpm for 30 min. The supernatant was carefully collected and diluted with water by 20 folds. Then 10-60 mL solutions were filtrated through a 220 nm Millipore ester membranes to prepare films. After filtration, the filter membranes were then transferred onto PET substrates, dried in air at 90 °C for 1 h and then dipped in acetone for 30 min to dissolve the filtration membrane leaving SWCNTs/GO thin films on the PET substrates. The obtained films were finally dried at 90 °C for 2 h.

**Post treatment:** First, films were immersed in 150 mM sodium borohydride solution for 2 h and then rinsed with deionized water followed by drying at 60 °C. Then, they were immersed in 5 wt% sodium hydroxide solution for 1 h followed by rinsing with deionized water and drying. At last, they were treated by 14 M nitric acid for 10 min and rinsing with abundant water.

**Characterization:** The dispersion states of SWCNTs/GO solution were characterized by TEM (JEM-2100F, JEOL, Tokyo, Japan). SEM images of SWCNT/GO films were taken on a field emission scanning electron microscope (FESEM, JEOL, JSM-6700F). The transmittance at 550 nm of the films was measured via a UV-vis spectrometer (Lambda 950, Perkin-Elmer, Shelton, USA). A four-point probe resistivity meter (Loresta EP MCP-T360, Mitsubishi Chemical, Japan) was used to measure the sheet resistance of the films. X-ray photoelectron spectra (XPS) analysis was conducted using the Mg K $\alpha$  (1253.6 eV) monochromatic X-ray source

(Axis Ultra DLD, Kratos). Raman spectra were recorded using a Thermofisher spectrometer (DXR) with an excitation length of 633 nm.

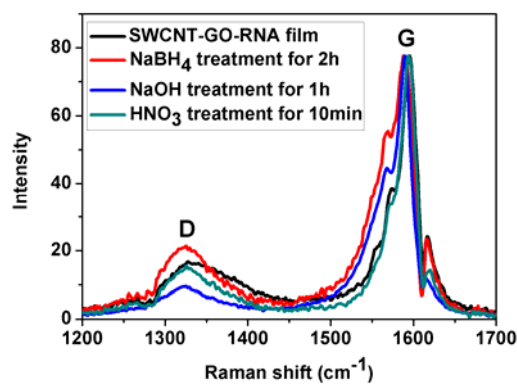

S1 Raman spectra of SWCNT/GO hybrid films before and after post-treatment

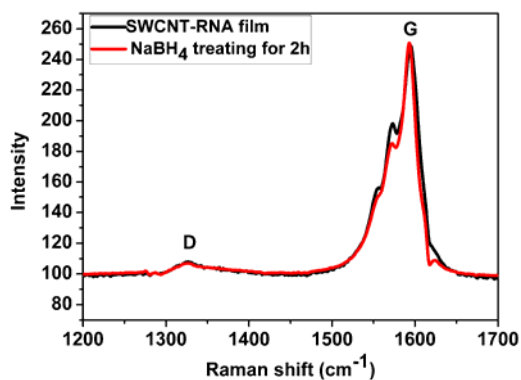

S2 Raman spectra of SWCNT films before and after treatment with NaBH<sub>4</sub>

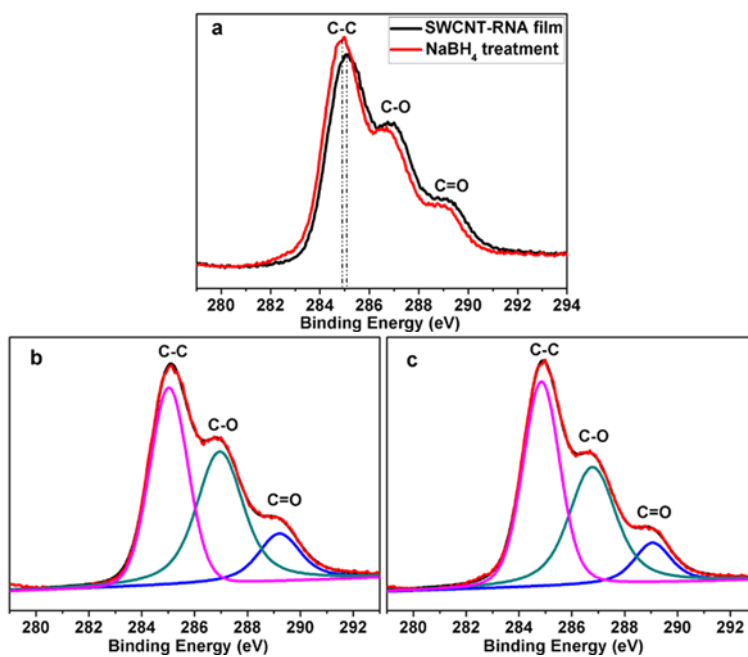

S3 XPS analysis of SWCNT films before and after treatment with NaBH<sub>4</sub>: (a) SWCNT films before and after NaBH<sub>4</sub> treatment; SWCNT film before (b) and after treatment (c) with its deconvolution into Gaussian curves.

Table 1 Atomic concentration (at. %) analysis of SWCNT/GO hybrid films before and after

| Semi-quantitative analysis            | treatment |     |      |      |
|---------------------------------------|-----------|-----|------|------|
|                                       | C         | N   | O    | P    |
| SWCNT-GO film                         | 62.1      | 4.1 | 28.2 | 0.05 |
| NaBH <sub>4</sub> treatment for 2 h   | 67.3      | 2.1 | 24.4 | 0.0  |
| NaOH treatment for 1 h                | 71.6      | 0.8 | 22.8 | 0.0  |
| HNO <sub>3</sub> treatment for 10 min | 68.4      | 3.7 | 22.4 | 0.0  |

Table 2 C1s peak position of SWCNT/GO hybrid film before and after treatment

| Samples                               | Peak position of C1s |
|---------------------------------------|----------------------|
| SWCNT-GO film                         | 285.01               |
| NaBH <sub>4</sub> treatment for 2 h   | 285.02               |
| NaOH treatment for 1 h                | 284.8                |
| HNO <sub>3</sub> treatment for 10 min | 284.68               |
